# Supplementary material
Source: ML conference proceedings conference paper supplement (https://openreview.net/forum?id=pY5ZhnZCEa)
Supplement: supplementary_material [file attachment]

# PreFIQs: Face Image Quality Is What Survives Pruning

## Supplementary Material

### 566 7. Supplementary Material Overview

567 This supplementary material contains the following sup-  
568 porting content:

- 569 • Detailed pAUC results across all four evaluated FR mod-  
570 els and pruning ratios  $\rho$ . These are provided for unstruc-  
571 tured  $L_1$  magnitude pruning (Table 6), unstructured ran-  
572 dom pruning (Table 7), and structured pruning (Table 8).
- 573 • A comprehensive comparison of FR verification accu-  
574 racy across different pruning granularities (unstructured  
575 vs. structured) and parameter selection criteria (unstruc-  
576 tured  $L_1$  magnitude vs. unstructured random pruning),  
577 detailed in Table 9.
- 578 • An extended comparison of PreFIQs (using unstructured  
579  $L_1$  magnitude pruning at  $\rho = 0.4$ ) against recent state-of-  
580 the-art FIQA approaches. Table 10 provides the pAUC  
581 results evaluated at an FMR of  $10^{-4}$  to complement the  
582 results provided in the main paper.
- 583 • Error-Versus-Discard Characteristic (EDC) curves compar-  
584 ing PreFIQs ( $\rho = 0.4$ ) against recent FIQA methods.  
585 These curves are plotted for an FMR of  $10^{-3}$  in Figure 4  
586 and an FMR of  $10^{-4}$  in Figure 5.
- 587 • Additional evaluations utilizing a ResNet50 backbone.  
588 Table 11 presents the pAUC results at an FMR of  $10^{-3}$   
589 across all four FR models using unstructured  $L_1$  magni-  
590 tude pruning.

Table 6. Performance of unstructured  $L_1$  magnitude pruning on four FR models using pAUC scores (discard rate = 0.3, FMR =  $10^{-3}$ ). We exclude XQLFW from this average, as its quality labels were derived using SER-FIQ. The best pAUC value is shaded.

| ArcFace [11] - pAUC * 10 <sup>3</sup> (FMR = 10 <sup>-3</sup> ) [4]        |               |              |              |              |               |               |                |               |
|----------------------------------------------------------------------------|---------------|--------------|--------------|--------------|---------------|---------------|----------------|---------------|
| Methods                                                                    | Adience       | AgeDB-30     | CFP-FP       | LFW          | CALFW         | CPLFW         | XQLFW          | pAUC          |
| Unstructured $L_1$ Magnitude Pruning $\rho = 0.1$                          | 9.933         | 6.866        | 3.779        | 0.849        | 21.913        | <b>29.809</b> | 139.497        | 10.691        |
| Unstructured $L_1$ Magnitude Pruning $\rho = 0.2$                          | 10.088        | 7.129        | <b>3.479</b> | 0.912        | 21.963        | <b>20.761</b> | <b>137.626</b> | 10.722        |
| Unstructured $L_1$ Magnitude Pruning $\rho = 0.3$                          | 9.798         | 6.991        | 3.972        | <b>0.779</b> | 22.219        | 21.045        | 143.120        | 10.801        |
| Unstructured $L_1$ Magnitude Pruning $\rho = 0.4$                          | 10.009        | 6.876        | 3.755        | 0.921        | <b>20.979</b> | 21.180        | 141.716        | <b>10.620</b> |
| Unstructured $L_1$ Magnitude Pruning $\rho = 0.5$                          | <b>9.734</b>  | 6.910        | <b>3.691</b> | 0.880        | 21.502        | 21.284        | 143.139        | 10.657        |
| Unstructured $L_1$ Magnitude Pruning $\rho = 0.6$                          | 9.795         | <b>6.659</b> | 3.832        | 0.788        | <b>21.169</b> | 23.142        | 146.722        | 10.903        |
| Unstructured $L_1$ Magnitude Pruning $\rho = 0.7$                          | 9.979         | <b>6.747</b> | 4.354        | 0.873        | 21.791        | 26.264        | 148.950        | 11.668        |
| Unstructured $L_1$ Magnitude Pruning $\rho = 0.8$                          | 11.466        | 8.280        | 8.139        | 0.832        | 22.271        | 41.568        | 160.413        | 15.426        |
| Unstructured $L_1$ Magnitude Pruning $\rho = 0.9$                          | 14.394        | 8.932        | 11.292       | 0.856        | 23.614        | 56.227        | 183.969        | 19.219        |
| CurricularFace [25] - pAUC * 10 <sup>3</sup> (FMR = 10 <sup>-3</sup> ) [4] |               |              |              |              |               |               |                |               |
| Methods                                                                    | Adience       | AgeDB-30     | CFP-FP       | LFW          | CALFW         | CPLFW         | XQLFW          | pAUC          |
| Unstructured $L_1$ Magnitude Pruning $\rho = 0.1$                          | 8.986         | <b>7.018</b> | 3.732        | 0.921        | 21.154        | <b>17.857</b> | 124.686        | 9.944         |
| Unstructured $L_1$ Magnitude Pruning $\rho = 0.2$                          | 9.153         | 7.593        | <b>3.484</b> | 0.952        | 21.252        | <b>17.598</b> | <b>121.306</b> | 10.005        |
| Unstructured $L_1$ Magnitude Pruning $\rho = 0.3$                          | <b>8.842</b>  | 7.032        | 3.868        | <b>0.779</b> | 21.441        | 18.011        | 124.430        | 9.995         |
| Unstructured $L_1$ Magnitude Pruning $\rho = 0.4$                          | 8.968         | 7.020        | 3.752        | 0.921        | <b>20.577</b> | 18.239        | 123.709        | 9.913         |
| Unstructured $L_1$ Magnitude Pruning $\rho = 0.5$                          | <b>8.786</b>  | 7.345        | <b>3.554</b> | 0.892        | 20.875        | 18.171        | 124.025        | 9.937         |
| Unstructured $L_1$ Magnitude Pruning $\rho = 0.6$                          | 8.882         | <b>6.927</b> | 3.864        | 0.808        | <b>20.554</b> | 18.380        | <b>123.356</b> | 9.903         |
| Unstructured $L_1$ Magnitude Pruning $\rho = 0.7$                          | 9.058         | 7.333        | 4.493        | 0.873        | 21.031        | 22.024        | 133.094        | 10.802        |
| Unstructured $L_1$ Magnitude Pruning $\rho = 0.8$                          | 10.412        | 8.578        | 8.283        | 0.832        | 21.529        | 33.501        | 145.322        | 13.856        |
| Unstructured $L_1$ Magnitude Pruning $\rho = 0.9$                          | 13.144        | 9.495        | 11.581       | 0.856        | 22.612        | 45.848        | 162.629        | 17.256        |
| ElasticFace [7] - pAUC * 10 <sup>3</sup> (FMR = 10 <sup>-3</sup> ) [4]     |               |              |              |              |               |               |                |               |
| Methods                                                                    | Adience       | AgeDB-30     | CFP-FP       | LFW          | CALFW         | CPLFW         | XQLFW          | pAUC          |
| Unstructured $L_1$ Magnitude Pruning $\rho = 0.1$                          | 10.651        | <b>6.314</b> | <b>3.391</b> | 0.785        | 21.125        | <b>19.664</b> | 131.822        | 10.290        |
| Unstructured $L_1$ Magnitude Pruning $\rho = 0.2$                          | 10.954        | 6.958        | 3.229        | 0.796        | 21.144        | <b>19.391</b> | <b>129.852</b> | 10.412        |
| Unstructured $L_1$ Magnitude Pruning $\rho = 0.3$                          | <b>10.592</b> | <b>6.586</b> | 3.306        | <b>0.664</b> | 21.356        | 19.740        | <b>129.723</b> | 10.389        |
| Unstructured $L_1$ Magnitude Pruning $\rho = 0.4$                          | 10.664        | 6.600        | 3.287        | 0.805        | <b>20.324</b> | 19.926        | 135.726        | 10.268        |
| Unstructured $L_1$ Magnitude Pruning $\rho = 0.5$                          | <b>10.584</b> | 6.657        | <b>3.102</b> | 0.776        | 20.690        | 19.889        | 139.316        | 10.283        |
| Unstructured $L_1$ Magnitude Pruning $\rho = 0.6$                          | 10.662        | 6.667        | 3.358        | 0.725        | <b>20.318</b> | 20.120        | 148.875        | 10.308        |
| Unstructured $L_1$ Magnitude Pruning $\rho = 0.7$                          | 11.088        | 6.686        | 3.879        | 0.757        | 20.884        | 23.476        | 146.510        | 11.128        |
| Unstructured $L_1$ Magnitude Pruning $\rho = 0.8$                          | 13.191        | 7.920        | 7.247        | <b>0.715</b> | 21.358        | 35.078        | 159.555        | 14.252        |
| Unstructured $L_1$ Magnitude Pruning $\rho = 0.9$                          | 16.575        | 9.039        | 10.293       | 0.739        | 22.483        | 48.956        | 172.481        | 18.014        |
| MagFace [35] - pAUC * 10 <sup>3</sup> (FMR = 10 <sup>-3</sup> ) [4]        |               |              |              |              |               |               |                |               |
| Methods                                                                    | Adience       | AgeDB-30     | CFP-FP       | LFW          | CALFW         | CPLFW         | XQLFW          | pAUC          |
| Unstructured $L_1$ Magnitude Pruning $\rho = 0.1$                          | 10.128        | <b>7.040</b> | <b>4.672</b> | 0.910        | 21.547        | 23.441        | 152.317        | 11.290        |
| Unstructured $L_1$ Magnitude Pruning $\rho = 0.2$                          | 10.299        | 7.999        | <b>4.683</b> | 0.921        | 21.637        | <b>22.645</b> | <b>148.797</b> | 11.364        |
| Unstructured $L_1$ Magnitude Pruning $\rho = 0.3$                          | 9.979         | 7.236        | 4.924        | <b>0.788</b> | 21.880        | <b>23.096</b> | <b>150.416</b> | 11.317        |
| Unstructured $L_1$ Magnitude Pruning $\rho = 0.4$                          | 10.146        | 7.432        | 4.805        | 0.947        | <b>20.981</b> | 23.261        | 154.940        | 11.262        |
| Unstructured $L_1$ Magnitude Pruning $\rho = 0.5$                          | <b>9.894</b>  | 7.285        | 4.749        | 0.936        | 21.258        | 23.174        | 153.128        | <b>11.216</b> |
| Unstructured $L_1$ Magnitude Pruning $\rho = 0.6$                          | <b>9.881</b>  | <b>7.177</b> | 5.053        | <b>0.854</b> | <b>20.826</b> | 23.531        | 157.902        | 11.217        |
| Unstructured $L_1$ Magnitude Pruning $\rho = 0.7$                          | 10.115        | 7.499        | 5.591        | 0.917        | 21.640        | 29.432        | 171.570        | 12.532        |
| Unstructured $L_1$ Magnitude Pruning $\rho = 0.8$                          | 11.667        | 9.018        | 9.489        | 0.841        | 22.207        | 54.756        | 179.703        | 17.996        |
| Unstructured $L_1$ Magnitude Pruning $\rho = 0.9$                          | 14.919        | 10.391       | 13.723       | 1.016        | 23.270        | 81.149        | 192.868        | 24.078        |

Figure 4. Comparison of EDC curves (FNMR at  $FMR=1e^{-3}$ ) of PreFIQs against recent FIQA approaches. The results are shown for four FR models on eight benchmarks. Unsupervised approaches are visualized using dotted lines. Supervised methods are visualized with dashed lines. PreFIQs is visualized using a continuous line with shaded AUC. For PreFIQs, unstructured  $L_1$  magnitude pruning with  $\rho = 0.4$  is used.

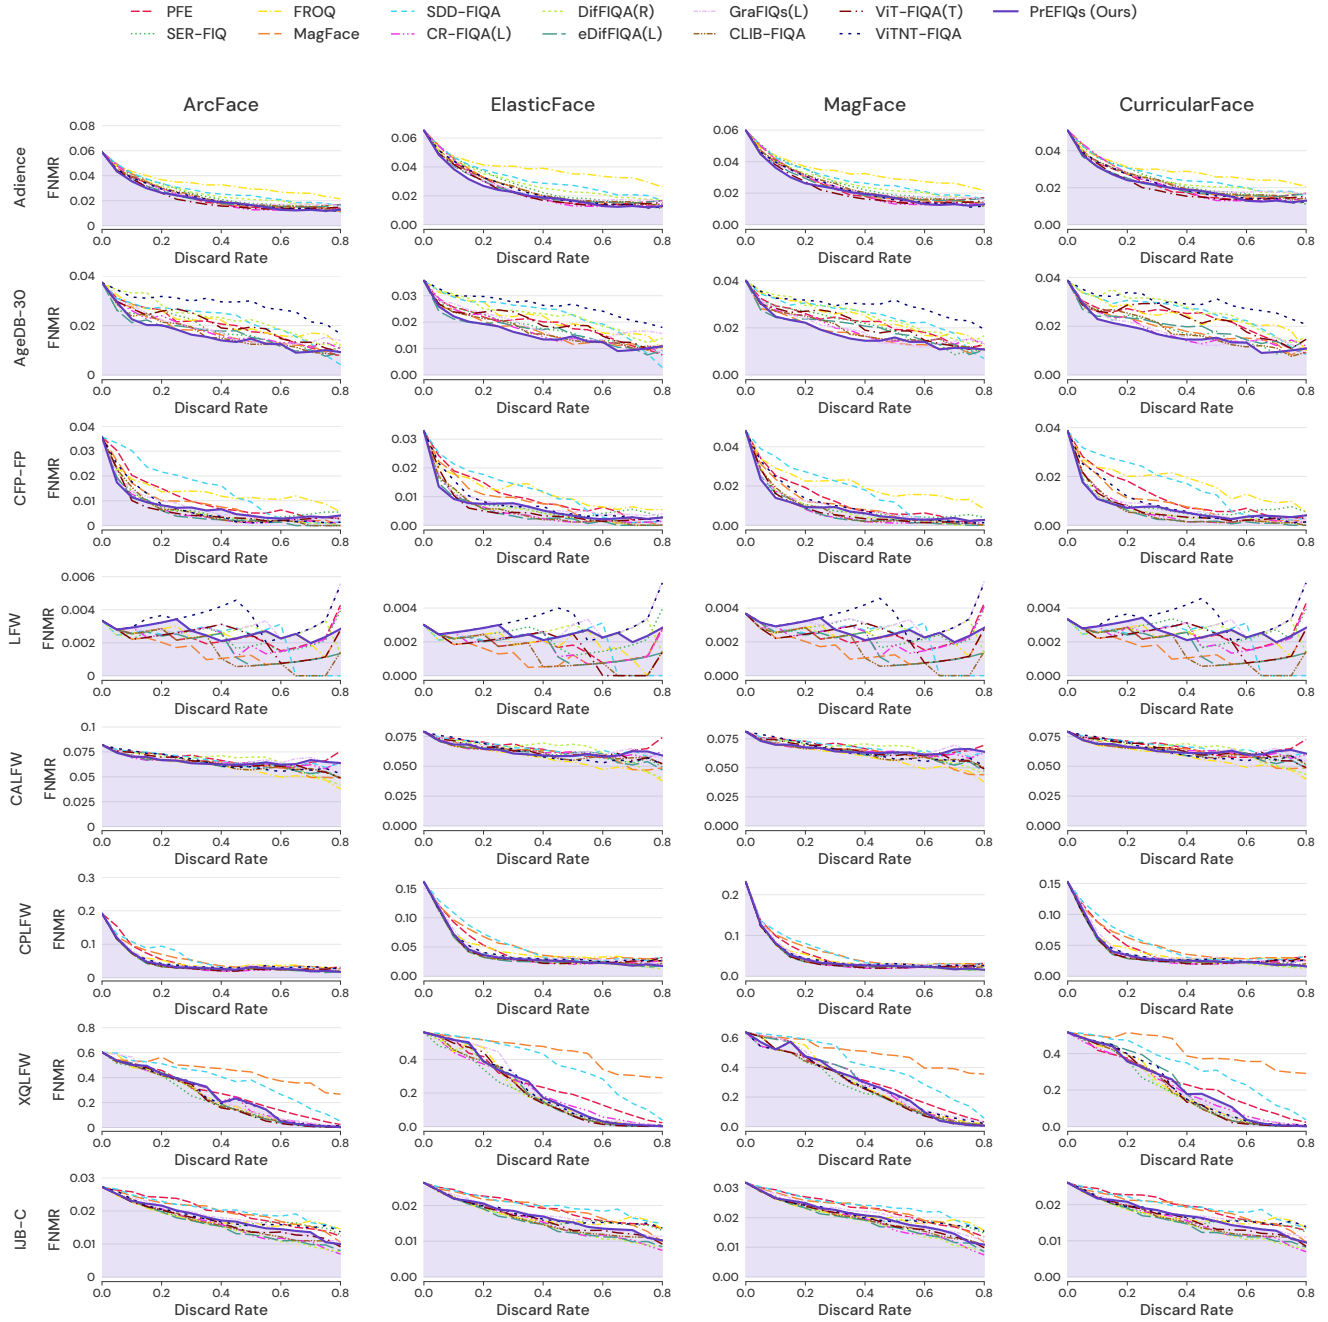

Figure 5. Comparison of EDC curves (FNMR at  $FMR=1e^{-4}$ ) of PreFIQs against recent FIQA approaches. The results are shown for four FR models on eight benchmarks. Unsupervised approaches are visualized using dotted lines. Supervised methods are visualized with dashed lines. PreFIQs is visualized using a continuous line with shaded AUC. For PreFIQs, unstructured  $L_1$  magnitude pruning with  $\rho = 0.4$  is used.

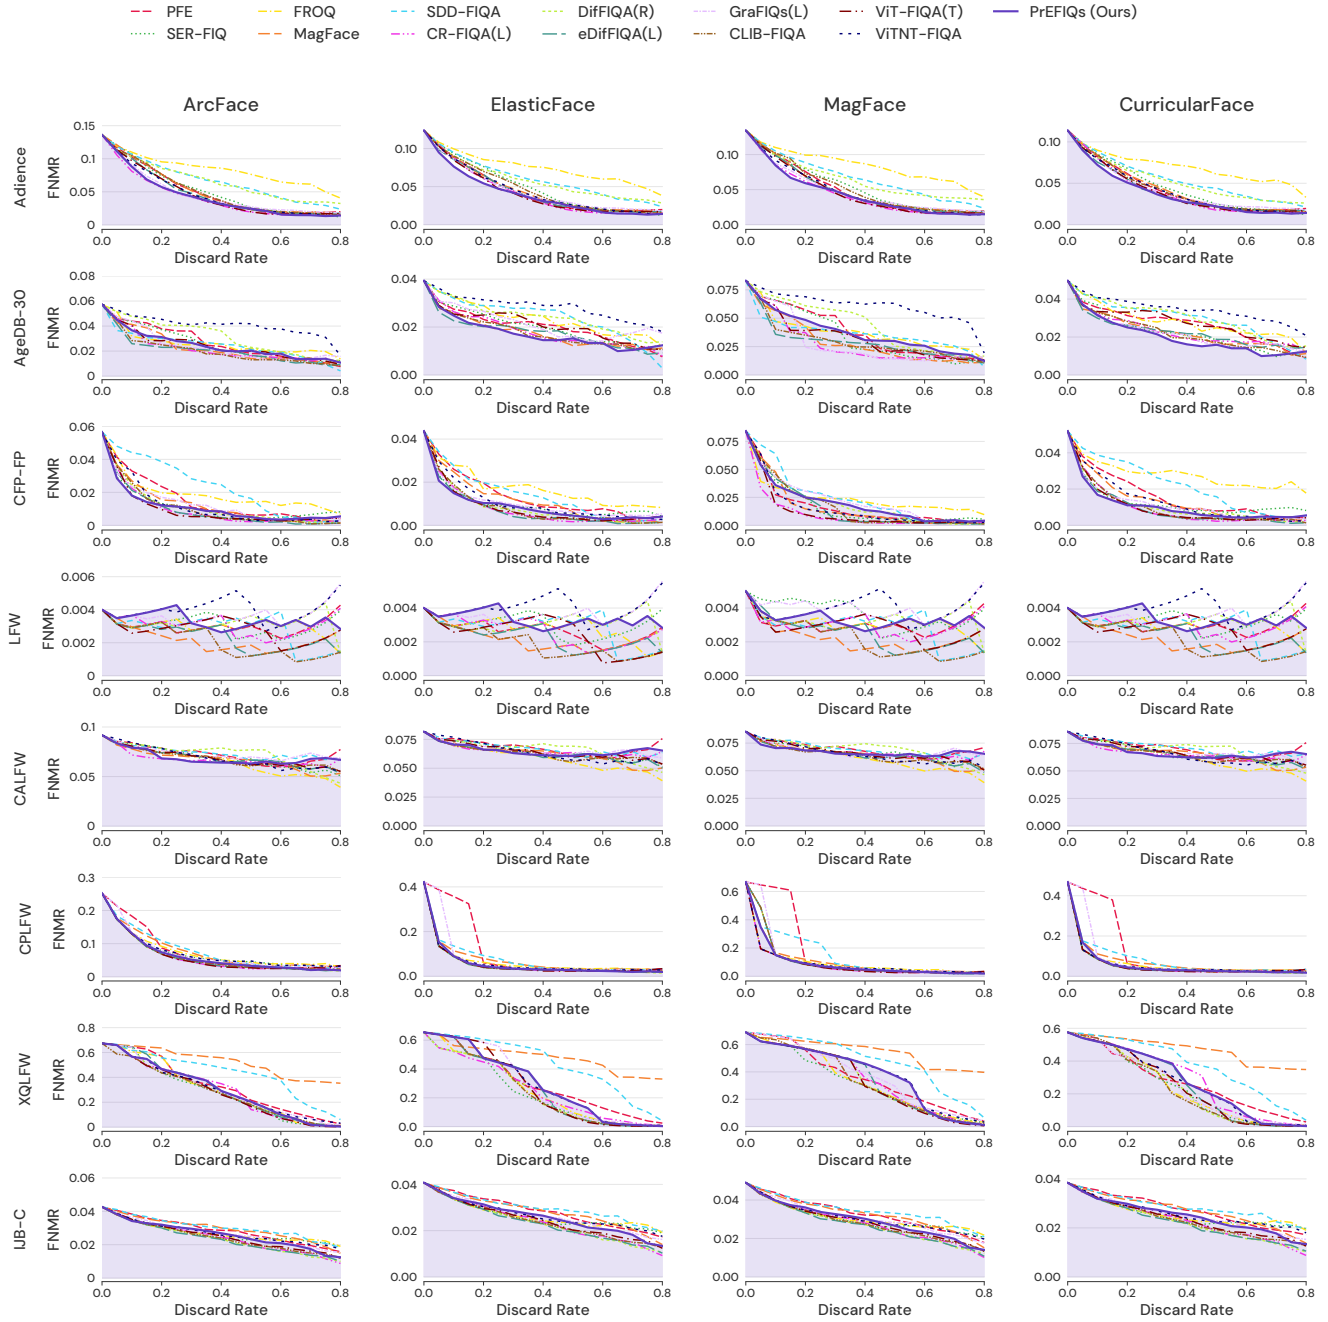

Table 7. Performance of **unstructured random pruning** on four FR models using pAUC scores (discard rate = 0.3, FMR =  $10^{-3}$ ). We exclude XQLFW from this average, as its quality labels were derived using SER-FIQ. The best pAUC value is shaded.

| ArcFace [11] - pAUC * 10 <sup>3</sup> (FMR= 10 <sup>-3</sup> ) [4] |         |          |        |       |        |        |         |        |
|--------------------------------------------------------------------|---------|----------|--------|-------|--------|--------|---------|--------|
| Methods                                                            | Adience | AgeDB-30 | CFP-FP | LFW   | CALFW  | CPLFW  | XQLFW   | pAUC   |
| Unstructured Random Pruning $\rho=0.1$                             | 15.057  | 8.802    | 10.271 | 0.738 | 22.996 | 50.725 | 185.933 | 18.098 |
| Unstructured Random Pruning $\rho=0.2$                             | 17.838  | 9.569    | 12.682 | 1.122 | 24.483 | 60.280 | 187.807 | 20.996 |
| Unstructured Random Pruning $\rho=0.3$                             | 16.583  | 10.460   | 12.331 | 0.912 | 24.369 | 60.005 | 180.625 | 20.777 |
| Unstructured Random Pruning $\rho=0.4$                             | 16.307  | 10.440   | 12.339 | 0.892 | 24.160 | 60.143 | 183.353 | 20.713 |
| Unstructured Random Pruning $\rho=0.5$                             | 15.748  | 10.466   | 12.097 | 0.925 | 24.225 | 60.499 | 185.443 | 20.660 |
| Unstructured Random Pruning $\rho=0.6$                             | 15.963  | 10.769   | 12.005 | 0.917 | 24.087 | 58.891 | 184.489 | 20.539 |
| Unstructured Random Pruning $\rho=0.7$                             | 16.281  | 10.303   | 12.139 | 0.991 | 24.426 | 59.896 | 183.915 | 20.688 |
| Unstructured Random Pruning $\rho=0.8$                             | 17.055  | 10.729   | 12.192 | 0.908 | 24.665 | 59.558 | 185.973 | 20.851 |
| Unstructured Random Pruning $\rho=0.9$                             | 16.982  | 10.296   | 12.013 | 0.891 | 24.739 | 59.662 | 186.222 | 20.764 |

  

| CurricularFace [25] - pAUC * 10 <sup>3</sup> (FMR= 10 <sup>-3</sup> ) [4] |         |          |        |       |        |        |         |        |
|---------------------------------------------------------------------------|---------|----------|--------|-------|--------|--------|---------|--------|
| Methods                                                                   | Adience | AgeDB-30 | CFP-FP | LFW   | CALFW  | CPLFW  | XQLFW   | pAUC   |
| Unstructured Random Pruning $\rho=0.1$                                    | 13.073  | 10.041   | 10.247 | 0.738 | 22.443 | 42.386 | 166.993 | 16.488 |
| Unstructured Random Pruning $\rho=0.2$                                    | 15.459  | 10.792   | 12.186 | 1.122 | 23.692 | 47.304 | 166.937 | 18.426 |
| Unstructured Random Pruning $\rho=0.3$                                    | 14.480  | 11.283   | 11.705 | 0.912 | 23.264 | 49.333 | 162.053 | 18.506 |
| Unstructured Random Pruning $\rho=0.4$                                    | 14.282  | 11.352   | 11.831 | 0.892 | 23.069 | 46.203 | 161.380 | 17.938 |
| Unstructured Random Pruning $\rho=0.5$                                    | 14.103  | 11.350   | 11.629 | 0.925 | 23.155 | 47.227 | 163.548 | 18.065 |
| Unstructured Random Pruning $\rho=0.6$                                    | 14.334  | 11.735   | 11.667 | 0.917 | 23.542 | 48.328 | 158.221 | 18.420 |
| Unstructured Random Pruning $\rho=0.7$                                    | 14.583  | 11.140   | 11.578 | 0.991 | 23.213 | 46.416 | 162.351 | 17.987 |
| Unstructured Random Pruning $\rho=0.8$                                    | 15.101  | 11.521   | 11.629 | 0.908 | 23.502 | 46.217 | 164.159 | 18.147 |
| Unstructured Random Pruning $\rho=0.9$                                    | 15.174  | 11.329   | 11.404 | 0.891 | 23.603 | 46.027 | 164.509 | 18.071 |

  

| ElasticFace [7] - pAUC * 10 <sup>3</sup> (FMR= 10 <sup>-3</sup> ) [4] |         |          |        |       |        |        |         |        |
|-----------------------------------------------------------------------|---------|----------|--------|-------|--------|--------|---------|--------|
| Methods                                                               | Adience | AgeDB-30 | CFP-FP | LFW   | CALFW  | CPLFW  | XQLFW   | pAUC   |
| Unstructured Random Pruning $\rho=0.1$                                | 17.014  | 8.479    | 8.921  | 0.621 | 22.330 | 44.025 | 175.487 | 16.808 |
| Unstructured Random Pruning $\rho=0.2$                                | 19.909  | 9.445    | 11.197 | 1.005 | 23.520 | 51.749 | 176.004 | 19.471 |
| Unstructured Random Pruning $\rho=0.3$                                | 18.670  | 9.683    | 10.557 | 0.796 | 23.383 | 51.002 | 170.618 | 19.015 |
| Unstructured Random Pruning $\rho=0.4$                                | 18.352  | 9.976    | 10.935 | 0.776 | 23.089 | 51.820 | 170.678 | 19.158 |
| Unstructured Random Pruning $\rho=0.5$                                | 17.806  | 9.854    | 10.513 | 0.809 | 23.295 | 51.880 | 173.129 | 19.026 |
| Unstructured Random Pruning $\rho=0.6$                                | 18.054  | 10.289   | 10.548 | 0.854 | 23.671 | 50.339 | 171.993 | 18.959 |
| Unstructured Random Pruning $\rho=0.7$                                | 18.405  | 9.777    | 10.423 | 0.874 | 23.376 | 51.147 | 171.672 | 19.000 |
| Unstructured Random Pruning $\rho=0.8$                                | 19.179  | 10.138   | 10.359 | 0.792 | 23.619 | 50.854 | 173.737 | 19.157 |
| Unstructured Random Pruning $\rho=0.9$                                | 19.155  | 9.768    | 10.309 | 0.775 | 23.754 | 51.312 | 173.965 | 19.179 |

  

| MagFace [35] - pAUC * 10 <sup>3</sup> (FMR= 10 <sup>-3</sup> ) [4] |         |          |        |       |        |        |         |        |
|--------------------------------------------------------------------|---------|----------|--------|-------|--------|--------|---------|--------|
| Methods                                                            | Adience | AgeDB-30 | CFP-FP | LFW   | CALFW  | CPLFW  | XQLFW   | pAUC   |
| Unstructured Random Pruning $\rho=0.1$                             | 15.261  | 9.712    | 12.488 | 0.822 | 23.015 | 68.953 | 196.552 | 21.708 |
| Unstructured Random Pruning $\rho=0.2$                             | 18.076  | 10.819   | 15.366 | 1.292 | 24.345 | 87.547 | 197.676 | 26.241 |
| Unstructured Random Pruning $\rho=0.3$                             | 17.095  | 11.352   | 14.751 | 0.992 | 24.040 | 87.775 | 193.409 | 26.001 |
| Unstructured Random Pruning $\rho=0.4$                             | 16.734  | 11.402   | 15.136 | 0.972 | 23.896 | 88.859 | 193.840 | 26.167 |
| Unstructured Random Pruning $\rho=0.5$                             | 16.289  | 11.336   | 14.845 | 1.005 | 23.924 | 89.931 | 195.817 | 26.222 |
| Unstructured Random Pruning $\rho=0.6$                             | 16.681  | 11.614   | 14.803 | 0.997 | 24.359 | 87.955 | 193.222 | 26.068 |
| Unstructured Random Pruning $\rho=0.7$                             | 17.001  | 11.159   | 14.704 | 1.069 | 24.148 | 88.618 | 194.451 | 26.117 |
| Unstructured Random Pruning $\rho=0.8$                             | 17.618  | 11.563   | 14.634 | 0.989 | 24.376 | 88.542 | 196.422 | 26.287 |
| Unstructured Random Pruning $\rho=0.9$                             | 17.572  | 11.068   | 14.375 | 0.970 | 24.555 | 89.114 | 196.850 | 26.276 |

Table 8. Performance of **structured pruning** on four FR models using pAUC scores (discard rate = 0.3, FMR =  $10^{-3}$ ). We exclude XQLFW from this average, as its quality labels were derived using SER-FIQ. The best pAUC value is shaded.

| ArcFace [11] - pAUC * 10 <sup>3</sup> (FMR= 10 <sup>-3</sup> ) [4] |         |          |        |       |        |        |         |        |
|--------------------------------------------------------------------|---------|----------|--------|-------|--------|--------|---------|--------|
| Methods                                                            | Adience | AgeDB-30 | CFP-FP | LFW   | CALFW  | CPLFW  | XQLFW   | pAUC   |
| Structured Pruning $\rho=0.1$                                      | 10.682  | 8.092    | 4.214  | 0.798 | 21.534 | 22.337 | 146.636 | 11.276 |
| Structured Pruning $\rho=0.2$                                      | 11.866  | 9.480    | 8.575  | 0.964 | 22.461 | 48.433 | 160.611 | 16.963 |
| Structured Pruning $\rho=0.3$                                      | 16.136  | 10.348   | 11.902 | 1.170 | 23.726 | 58.509 | 174.307 | 20.299 |
| Structured Pruning $\rho=0.4$                                      | 16.447  | 11.296   | 12.291 | 0.932 | 25.109 | 55.601 | 174.252 | 20.279 |
| Structured Pruning $\rho=0.5$                                      | 16.254  | 11.354   | 11.728 | 0.909 | 24.631 | 57.294 | 176.949 | 20.362 |
| Structured Pruning $\rho=0.6$                                      | 15.875  | 11.021   | 11.655 | 0.929 | 24.645 | 57.736 | 177.852 | 20.310 |
| Structured Pruning $\rho=0.7$                                      | 17.205  | 10.568   | 11.681 | 1.005 | 24.748 | 57.508 | 173.673 | 20.452 |
| Structured Pruning $\rho=0.8$                                      | 16.181  | 10.400   | 11.986 | 1.011 | 24.774 | 58.010 | 175.532 | 20.394 |
| Structured Pruning $\rho=0.9$                                      | 16.529  | 9.951    | 12.482 | 0.967 | 24.638 | 59.317 | 178.910 | 20.647 |

  

| CurricularFace [25] - pAUC * 10 <sup>3</sup> (FMR= 10 <sup>-3</sup> ) [4] |         |          |        |       |        |        |         |        |
|---------------------------------------------------------------------------|---------|----------|--------|-------|--------|--------|---------|--------|
| Methods                                                                   | Adience | AgeDB-30 | CFP-FP | LFW   | CALFW  | CPLFW  | XQLFW   | pAUC   |
| Structured Pruning $\rho=0.1$                                             | 9.438   | 8.264    | 4.576  | 0.851 | 20.940 | 19.171 | 133.453 | 10.540 |
| Structured Pruning $\rho=0.2$                                             | 10.507  | 10.131   | 9.091  | 0.964 | 21.591 | 39.515 | 139.968 | 15.300 |
| Structured Pruning $\rho=0.3$                                             | 14.202  | 10.617   | 12.293 | 1.170 | 22.872 | 48.333 | 158.205 | 18.248 |
| Structured Pruning $\rho=0.4$                                             | 14.424  | 12.192   | 12.186 | 0.932 | 23.906 | 47.932 | 156.167 | 18.595 |
| Structured Pruning $\rho=0.5$                                             | 14.431  | 11.997   | 11.473 | 0.929 | 23.468 | 47.403 | 155.834 | 18.280 |
| Structured Pruning $\rho=0.6$                                             | 14.240  | 11.372   | 11.365 | 0.929 | 23.537 | 46.968 | 156.709 | 18.069 |
| Structured Pruning $\rho=0.7$                                             | 15.091  | 10.823   | 11.632 | 1.005 | 23.723 | 47.080 | 157.546 | 18.226 |
| Structured Pruning $\rho=0.8$                                             | 14.372  | 11.092   | 11.446 | 1.011 | 23.659 | 47.229 | 155.716 | 18.135 |
| Structured Pruning $\rho=0.9$                                             | 14.664  | 10.698   | 11.942 | 0.967 | 23.536 | 48.810 | 162.417 | 18.436 |

  

| ElasticFace [7] - pAUC * 10 <sup>3</sup> (FMR= 10 <sup>-3</sup> ) [4] |         |          |        |       |        |        |         |        |
|-----------------------------------------------------------------------|---------|----------|--------|-------|--------|--------|---------|--------|
| Methods                                                               | Adience | AgeDB-30 | CFP-FP | LFW   | CALFW  | CPLFW  | XQLFW   | pAUC   |
| Structured Pruning $\rho=0.1$                                         | 11.861  | 7.862    | 3.872  | 0.692 | 20.568 | 20.907 | 138.529 | 10.960 |
| Structured Pruning $\rho=0.2$                                         | 13.507  | 9.249    | 8.052  | 0.846 | 21.444 | 41.140 | 156.850 | 15.706 |
| Structured Pruning $\rho=0.3$                                         | 18.070  | 9.691    | 10.516 | 1.053 | 22.736 | 50.392 | 167.648 | 18.743 |
| Structured Pruning $\rho=0.4$                                         | 18.709  | 10.760   | 10.807 | 0.815 | 24.068 | 49.996 | 165.012 | 19.192 |
| Structured Pruning $\rho=0.5$                                         | 18.484  | 10.698   | 10.304 | 0.793 | 23.627 | 49.438 | 164.708 | 18.891 |
| Structured Pruning $\rho=0.6$                                         | 18.115  | 10.198   | 10.425 | 0.813 | 23.675 | 49.046 | 165.614 | 18.712 |
| Structured Pruning $\rho=0.7$                                         | 19.485  | 9.707    | 10.470 | 0.890 | 23.947 | 49.210 | 165.305 | 18.952 |
| Structured Pruning $\rho=0.8$                                         | 18.584  | 9.732    | 10.521 | 0.906 | 23.850 | 49.320 | 168.750 | 18.819 |
| Structured Pruning $\rho=0.9$                                         | 18.753  | 9.396    | 10.646 | 0.851 | 23.601 | 50.980 | 171.624 | 19.038 |

  

| MagFace [35] - pAUC * 10 <sup>3</sup> (FMR= 10 <sup>-3</sup> ) [4] |         |          |        |       |        |        |         |        |
|--------------------------------------------------------------------|---------|----------|--------|-------|--------|--------|---------|--------|
| Methods                                                            | Adience | AgeDB-30 | CFP-FP | LFW   | CALFW  | CPLFW  | XQLFW   | pAUC   |
| Structured Pruning $\rho=0.1$                                      | 10.798  | 8.508    | 5.147  | 0.824 | 21.508 | 23.844 | 158.485 | 11.771 |
| Structured Pruning $\rho=0.2$                                      | 12.385  | 10.379   | 11.155 | 1.052 | 22.203 | 68.994 | 171.634 | 15.028 |
| Structured Pruning $\rho=0.3$                                      | 16.519  | 11.074   | 15.199 | 1.307 | 23.296 | 85.109 | 179.578 | 25.417 |
| Structured Pruning $\rho=0.4$                                      | 17.022  | 12.235   | 15.101 | 0.983 | 24.704 | 86.582 | 186.718 | 26.106 |
| Structured Pruning $\rho=0.5$                                      | 16.890  | 12.097   | 14.587 | 0.988 | 24.281 | 86.486 | 187.859 | 25.880 |
| Structured Pruning $\rho=0.6$                                      | 16.528  | 11.688   | 14.496 | 1.009 | 24.339 | 82.950 | 187.531 | 25.168 |
| Structured Pruning $\rho=0.7$                                      | 17.828  | 11.149   | 14.474 | 1.085 | 24.584 | 85.853 | 187.248 | 25.829 |
| Structured Pruning $\rho=0.8$                                      | 16.881  | 11.296   | 14.667 | 1.091 | 24.497 | 86.012 | 191.370 | 25.741 |
| Structured Pruning $\rho=0.9$                                      | 17.257  | 10.736   | 15.155 | 1.064 | 24.268 | 87.703 | 194.474 | 26.031 |

Table 9. Verification accuracy (%) of ResNet-100 under different pruning strategies at rates  $\rho \in \{0.1, \dots, 0.9\}$ . The best and second-best results per dataset are highlighted.

| Granularity of Pruning - Comparison between unstructured and structured model pruning [†] |              |              |              |              |              |              |         |
|-------------------------------------------------------------------------------------------|--------------|--------------|--------------|--------------|--------------|--------------|---------|
| Methods                                                                                   | LFW          | CFP-PP       | CFP-FF       | AgeDB-30     | CALFW        | CPLFW        | Acc [†] |
| <b>ResNet-100 (unpruned)</b>                                                              | <b>99.80</b> | <b>96.67</b> | <b>99.89</b> | 98.35        | <b>96.15</b> | <b>93.32</b> | 97.36   |
| Unstructured $\rho=0.1$                                                                   | <b>99.80</b> | <b>96.67</b> | <b>99.89</b> | <b>98.43</b> | <b>96.17</b> | <b>93.23</b> | 97.37   |
| Unstructured $\rho=0.2$                                                                   | <b>99.80</b> | <b>96.70</b> | <b>99.89</b> | <b>98.43</b> | <b>96.17</b> | <b>93.23</b> | 97.37   |
| Unstructured $\rho=0.3$                                                                   | <b>99.80</b> | 96.59        | <b>99.89</b> | <b>98.42</b> | 96.08        | 93.17        | 97.32   |
| Unstructured $\rho=0.4$                                                                   | <b>99.80</b> | 96.44        | <b>99.89</b> | 98.32        | 96.08        | 93.18        | 97.29   |
| Unstructured $\rho=0.5$                                                                   | <b>99.80</b> | 96.36        | <b>99.90</b> | 98.20        | 96.00        | 92.70        | 97.16   |
| Unstructured $\rho=0.6$                                                                   | <b>99.80</b> | 95.79        | <b>99.90</b> | 98.05        | 96.02        | 92.22        | 96.96   |
| Unstructured $\rho=0.7$                                                                   | 99.75        | 94.87        | 99.79        | 97.50        | 95.85        | 90.38        | 96.36   |
| Unstructured $\rho=0.8$                                                                   | 99.57        | 87.50        | 99.39        | 94.70        | 94.35        | 82.92        | 93.07   |
| Unstructured $\rho=0.9$                                                                   | 90.45        | 65.76        | 91.87        | 75.27        | 78.37        | 58.87        | 76.76   |
| Structured $\rho=0.1$                                                                     | 99.77        | 95.30        | 99.84        | 97.82        | 95.88        | 91.07        | 96.61   |
| Structured $\rho=0.2$                                                                     | 98.17        | 81.74        | 98.01        | 89.85        | 90.63        | 76.20        | 89.10   |
| Structured $\rho=0.3$                                                                     | 82.90        | 58.71        | 79.10        | 71.93        | 68.22        | 56.72        | 69.60   |
| Structured $\rho=0.4$                                                                     | 73.83        | 57.83        | 73.36        | 60.85        | 60.67        | 54.62        | 63.53   |
| Structured $\rho=0.5$                                                                     | 72.47        | 59.39        | 71.50        | 58.35        | 58.92        | 52.77        | 62.23   |
| Structured $\rho=0.6$                                                                     | 65.63        | 55.69        | 69.29        | 53.88        | 56.70        | 51.63        | 58.80   |
| Structured $\rho=0.7$                                                                     | 51.12        | 50.19        | 51.26        | 50.10        | 50.17        | 50.60        | 50.57   |
| Structured $\rho=0.8$                                                                     | 50.72        | 50.43        | 51.31        | 50.20        | 50.12        | 50.08        | 50.48   |
| Structured $\rho=0.9$                                                                     | 50.00        | 50.00        | 50.00        | 50.00        | 50.00        | 50.00        | 50.00   |
| Pruning Criterion - Comparison between $L_1$ magnitude and random model pruning [†]       |              |              |              |              |              |              |         |
| Methods                                                                                   | LFW          | CFP-PP       | CFP-FF       | AgeDB-30     | CALFW        | CPLFW        | Acc [†] |
| <b>ResNet-100 (unpruned)</b>                                                              | <b>99.80</b> | <b>96.67</b> | <b>99.89</b> | 98.35        | <b>96.15</b> | <b>93.32</b> | 97.36   |
| $L_1$ Magnitude $\rho=0.1$                                                                | <b>99.80</b> | <b>96.67</b> | <b>99.89</b> | <b>98.43</b> | <b>96.17</b> | <b>93.23</b> | 97.37   |
| $L_1$ Magnitude $\rho=0.2$                                                                | <b>99.80</b> | <b>96.70</b> | <b>99.89</b> | <b>98.43</b> | <b>96.17</b> | <b>93.23</b> | 97.37   |
| $L_1$ Magnitude $\rho=0.3$                                                                | <b>99.80</b> | 96.59        | <b>99.89</b> | <b>98.42</b> | 96.08        | 93.17        | 97.32   |
| $L_1$ Magnitude $\rho=0.4$                                                                | <b>99.80</b> | 96.44        | <b>99.89</b> | 98.32        | 96.08        | 93.18        | 97.29   |
| $L_1$ Magnitude $\rho=0.5$                                                                | <b>99.80</b> | 96.36        | <b>99.90</b> | 98.20        | 96.00        | 92.70        | 97.16   |
| $L_1$ Magnitude $\rho=0.6$                                                                | <b>99.80</b> | 95.79        | <b>99.90</b> | 98.05        | 96.02        | 92.22        | 96.96   |
| $L_1$ Magnitude $\rho=0.7$                                                                | 99.75        | 94.87        | 99.79        | 97.50        | 95.85        | 90.38        | 96.36   |
| $L_1$ Magnitude $\rho=0.8$                                                                | 99.57        | 87.50        | 99.39        | 94.70        | 94.35        | 82.92        | 93.07   |
| $L_1$ Magnitude $\rho=0.9$                                                                | 90.45        | 65.76        | 91.87        | 75.27        | 78.37        | 58.87        | 76.76   |
| Random $\rho=0.1$                                                                         | 97.43        | 77.86        | 98.03        | 82.82        | 89.18        | 73.52        | 86.47   |
| Random $\rho=0.2$                                                                         | 77.00        | 59.67        | 75.30        | 57.85        | 62.23        | 58.23        | 65.05   |
| Random $\rho=0.3$                                                                         | 71.73        | 59.83        | 73.21        | 56.63        | 57.88        | 55.07        | 62.39   |
| Random $\rho=0.4$                                                                         | 64.80        | 56.89        | 71.83        | 57.47        | 56.75        | 54.48        | 60.37   |
| Random $\rho=0.5$                                                                         | 50.00        | 50.00        | 50.00        | 50.00        | 50.00        | 50.00        | 50.00   |
| Random $\rho=0.6$                                                                         | 50.00        | 50.00        | 50.00        | 50.00        | 50.00        | 50.00        | 50.00   |
| Random $\rho=0.7$                                                                         | 50.00        | 50.00        | 50.00        | 50.00        | 50.00        | 50.00        | 50.00   |
| Random $\rho=0.8$                                                                         | 50.00        | 50.00        | 50.00        | 50.00        | 50.00        | 50.00        | 50.00   |
| Random $\rho=0.9$                                                                         | 50.00        | 50.00        | 50.00        | 50.00        | 50.00        | 50.00        | 50.00   |

Table 10. Performance comparison of four FR models using pAUC scores (discard rate = 0.3, FMR =  $10^{-4}$ ). The best and second-best results per dataset are highlighted. The final column displays the average pAUC across all benchmarks. We exclude XQLFW from this average to prevent evaluation bias, as its quality labels were derived using SER-FIQ. The best average pAUC is highlighted in GREEN for supervised approaches (marked using green stripes), and BLUE for unsupervised approaches (marked with blue stripes).

| ArcFace [11] - pAUC * 10 <sup>3</sup> (FMR = 10 <sup>-4</sup> ) [‡]        |               |               |              |              |               |               |                |               |               |
|----------------------------------------------------------------------------|---------------|---------------|--------------|--------------|---------------|---------------|----------------|---------------|---------------|
| Methods                                                                    | Adience       | AgeDB-30      | CFP-PP       | LFW          | CALFW         | CPLFW         | XQLFW          | IJB-C         | pAUC          |
| RankIQ [9]                                                                 | 35.792        | 17.131        | 13.301       | 0.929        | 25.432        | 48.441        | 172.415        | 12.200        | 21.889        |
| PFE [46]                                                                   | 27.089        | 12.675        | 8.976        | 0.921        | 24.361        | 42.758        | 171.946        | 11.003        | 18.255        |
| SDD-FIQA [37]                                                              | 29.760        | 10.189        | 12.499       | 0.963        | 24.245        | 41.998        | 178.590        | 11.039        | 18.670        |
| MagFace [35]                                                               | 27.522        | 10.816        | 7.495        | <b>0.841</b> | 22.829        | 39.988        | 190.526        | 10.883        | 17.196        |
| CR-FIQA(L) [8]                                                             | <b>22.352</b> | 9.983         | 6.166        | 1.012        | <b>21.958</b> | <b>33.201</b> | 159.127        | 10.114        | 14.970        |
| DiffQA(R) [4]                                                              | 29.121        | 13.729        | 6.707        | 0.930        | 24.367        | 33.550        | 158.615        | 9.872         | 16.897        |
| dDiffQA(L) [5]                                                             | 25.487        | <b>8.878</b>  | 6.048        | 0.908        | 23.466        | 33.348        | 166.808        | <b>9.790</b>  | 15.418        |
| CLB-FIQA [40]                                                              | 27.319        | 9.436         | 6.800        | 0.915        | 23.340        | 33.627        | <b>150.932</b> | 9.857         | 15.909        |
| VIT-FIQA(T) [‡]                                                            | 25.664        | 10.734        | <b>5.663</b> | <i>0.896</i> | 23.614        | 33.388        | 156.275        | 10.118        | 15.725        |
| FRQ [6]                                                                    | 31.630        | 10.388        | 8.296        | 0.959        | 23.453        | 37.003        | 167.705        | 9.919         | 17.378        |
| SER-FIQ [48]                                                               | 27.434        | 12.283        | 6.305        | 0.975        | 24.202        | 35.086        | 156.847        | 10.093        | 16.625        |
| FaceNet [20, 21]                                                           | 35.469        | 12.704        | 11.470       | 1.132        | 25.723        | 65.278        | 202.213        | 12.698        | 23.496        |
| GraFIQs(L) [31]                                                            | 23.757        | 11.034        | 7.103        | 1.040        | 23.900        | 37.669        | 158.682        | 10.294        | 16.399        |
| VITNT-FIQA [42]                                                            | 25.196        | 14.276        | 7.340        | 1.149        | 24.402        | 35.678        | 158.107        | 10.233        | 16.896        |
| PreFIQs (Ours)                                                             | <b>23.200</b> | 10.744        | <b>5.884</b> | 1.142        | <b>22.737</b> | 34.380        | 160.838        | 10.192        | <b>15.469</b> |
| CurricularFace [25] - pAUC * 10 <sup>3</sup> (FMR = 10 <sup>-4</sup> ) [‡] |               |               |              |              |               |               |                |               |               |
| Methods                                                                    | Adience       | AgeDB-30      | CFP-PP       | LFW          | CALFW         | CPLFW         | XQLFW          | IJB-C         | pAUC          |
| RankIQ [9]                                                                 | 28.973        | 13.897        | 12.347       | 0.929        | 23.731        | 44.689        | 152.020        | 11.229        | 19.399        |
| PFE [46]                                                                   | 22.063        | 10.451        | 8.741        | 0.921        | 23.196        | 79.334        | <b>137.743</b> | 10.231        | 22.134        |
| SDD-FIQA [37]                                                              | 24.334        | 11.549        | 11.167       | 0.963        | 23.413        | 44.873        | 162.193        | 10.053        | 18.050        |
| MagFace [35]                                                               | 22.276        | 9.427         | 7.489        | <b>0.841</b> | 21.915        | 38.775        | 163.263        | 9.987         | 15.816        |
| CR-FIQA(L) [8]                                                             | 21.058        | 9.511         | 5.964        | 1.012        | <b>21.397</b> | 29.761        | 149.557        | 9.247         | 14.121        |
| DiffQA(R) [4]                                                              | 23.109        | 11.749        | 5.982        | 0.930        | 22.762        | 29.538        | 141.513        | 9.163         | 14.747        |
| dDiffQA(L) [5]                                                             | <i>20.309</i> | <b>8.948</b>  | <i>5.693</i> | 0.908        | 21.994        | <b>29.462</b> | 148.370        | <b>9.044</b>  | 13.766        |
| CLB-FIQA [40]                                                              | 21.731        | 9.634         | 6.076        | 0.915        | 22.897        | 29.973        | 141.835        | 9.251         | 14.211        |
| VIT-FIQA(T) [‡]                                                            | 20.890        | 10.593        | <i>5.800</i> | <i>0.896</i> | 22.717        | 29.590        | 144.613        | 9.322         | 14.258        |
| FRQ [6]                                                                    | 26.215        | 10.810        | 10.309       | 0.959        | 22.092        | 33.024        | 142.794        | <i>9.119</i>  | 16.075        |
| SER-FIQ [48]                                                               | 23.264        | 9.451         | 5.808        | 0.975        | 22.653        | 32.754        | 138.231        | 9.210         | 14.874        |
| FaceNet [20, 21]                                                           | 29.768        | 11.695        | 11.412       | 1.132        | 24.303        | 125.926       | 175.338        | 11.664        | 30.843        |
| GraFIQs(L) [31]                                                            | 20.743        | 9.199         | 6.143        | 1.040        | 22.502        | 47.312        | 141.425        | 9.456         | 16.628        |
| VITNT-FIQA [42]                                                            | 21.473        | 12.199        | 7.714        | 1.149        | 23.177        | 31.136        | 144.810        | 9.464         | 15.187        |
| PreFIQs (Ours)                                                             | <b>19.560</b> | <i>9.020</i>  | <b>5.533</b> | 1.142        | <i>21.648</i> | 32.238        | 148.557        | 9.425         | <b>14.081</b> |
| ElasticFace [7] - pAUC * 10 <sup>3</sup> (FMR = 10 <sup>-4</sup> ) [‡]     |               |               |              |              |               |               |                |               |               |
| Methods                                                                    | Adience       | AgeDB-30      | CFP-PP       | LFW          | CALFW         | CPLFW         | XQLFW          | IJB-C         | pAUC          |
| RankIQ [9]                                                                 | 32.314        | 11.553        | 9.822        | 0.929        | 22.184        | 43.910        | 153.491        | 11.891        | 18.943        |
| PFE [46]                                                                   | 23.534        | 7.988         | 7.174        | 0.921        | 22.110        | 70.252        | 160.004        | 10.694        | 20.382        |
| SDD-FIQA [37]                                                              | 26.484        | 9.384         | 7.541        | 0.963        | 22.013        | 41.128        | 185.308        | 10.579        | 16.870        |
| MagFace [35]                                                               | 23.591        | 7.355         | 6.552        | <b>0.841</b> | 20.984        | 37.621        | 170.809        | 10.497        | 15.349        |
| CR-FIQA(L) [8]                                                             | 22.961        | 7.895         | 4.795        | 1.012        | <i>20.747</i> | 29.283        | 145.298        | 9.764         | 13.779        |
| DiffQA(R) [4]                                                              | 25.311        | 9.199         | 4.956        | 0.870        | 21.605        | <b>28.757</b> | 149.565        | <i>9.596</i>  | 14.328        |
| dDiffQA(L) [5]                                                             | 23.121        | <b>7.031</b>  | <b>4.566</b> | 0.848        | 20.828        | 28.759        | 161.211        | <b>9.511</b>  | 13.523        |
| CLB-FIQA [40]                                                              | 24.724        | 7.561         | 5.055        | 0.842        | 20.782        | 29.149        | 159.775        | 9.701         | 13.974        |
| VIT-FIQA(T) [‡]                                                            | 22.535        | 8.123         | 4.803        | 0.806        | 21.569        | 29.220        | 172.150        | 9.764         | 13.844        |
| FRQ [6]                                                                    | 28.572        | 9.162         | 7.599        | 0.959        | <b>20.723</b> | 32.372        | 154.630        | 9.615         | 15.572        |
| SER-FIQ [48]                                                               | 25.769        | 8.272         | 4.833        | 0.975        | 21.701        | 31.266        | <b>143.390</b> | 9.659         | 14.639        |
| FaceNet [20, 21]                                                           | 32.043        | 9.529         | 9.728        | 1.059        | 23.390        | 112.090       | 195.806        | 12.382        | 28.603        |
| GraFIQs(L) [31]                                                            | 22.707        | 8.521         | 5.193        | 1.040        | 21.409        | 43.509        | 177.210        | 10.044        | 16.060        |
| VITNT-FIQA [42]                                                            | 23.405        | 8.884         | 5.827        | 1.149        | 22.154        | 30.853        | 166.858        | 9.907         | 14.740        |
| PreFIQs (Ours)                                                             | <b>20.954</b> | <i>7.150</i>  | <i>4.711</i> | 1.142        | 20.936        | 30.677        | 166.140        | 9.964         | <b>13.648</b> |
| MagFace [35] - pAUC * 10 <sup>3</sup> (FMR = 10 <sup>-4</sup> ) [‡]        |               |               |              |              |               |               |                |               |               |
| Methods                                                                    | Adience       | AgeDB-30      | CFP-PP       | LFW          | CALFW         | CPLFW         | XQLFW          | IJB-C         | pAUC          |
| RankIQ [9]                                                                 | 35.315        | 23.671        | 20.646       | 1.207        | 23.341        | 120.130       | 178.752        | 13.872        | 34.026        |
| PFE [46]                                                                   | 26.848        | 18.720        | 9.904        | 0.946        | 22.728        | 121.181       | 178.028        | 12.481        | 30.401        |
| SDD-FIQA [37]                                                              | 29.644        | 14.141        | 14.142       | 0.987        | 22.965        | 91.491        | 196.530        | 12.468        | 26.548        |
| MagFace [35]                                                               | 25.897        | 14.706        | 10.157       | <b>0.865</b> | 21.743        | 62.562        | 190.811        | 12.241        | 21.167        |
| CR-FIQA(L) [8]                                                             | <i>23.460</i> | 13.942        | <b>6.347</b> | 0.961        | 21.650        | <b>48.232</b> | 177.183        | 11.418        | 18.001        |
| DiffQA(R) [4]                                                              | 28.100        | 19.892        | 11.839       | 0.990        | 22.712        | 63.122        | 176.827        | <i>11.162</i> | 22.545        |
| dDiffQA(L) [5]                                                             | 25.601        | <b>12.583</b> | 10.986       | 1.003        | 21.536        | 62.819        | 176.440        | <b>11.076</b> | 20.801        |
| CLB-FIQA [40]                                                              | 27.333        | <i>13.463</i> | 11.688       | 0.993        | <i>21.479</i> | 63.054        | 180.233        | 11.278        | 21.326        |
| VIT-FIQA(T) [‡]                                                            | 25.507        | 15.333        | <i>7.463</i> | <i>0.938</i> | 22.771        | <i>48.300</i> |                |               |               |

Table 11. Performance of **ResNet50 trained on CASIA-Webface [51] using ArcFace [11]** on four FR models using pAUC scores (discard rate = 0.3, FMR =  $10^{-3}$ ). ResNet-50 is pruned using unstructured  $L_1$  magnitude pruning. The **best** and *second-best* results per dataset are highlighted. The final column displays the average pAUC across all benchmarks. We exclude XQLFW from this average, as its quality labels were derived using SER-FIQ.

| ArcFace [11] - $pAUC * 10^3$ (FMR = $10^{-3}$ ) [4]        |               |               |               |              |               |               |                |                   |  |
|------------------------------------------------------------|---------------|---------------|---------------|--------------|---------------|---------------|----------------|-------------------|--|
| Methods                                                    | Adience       | AgeDB-30      | CFP-FP        | LFW          | CALFW         | CPLFW         | XQLFW          | $\overline{pAUC}$ |  |
| Unstructured $\rho = 0.1$                                  | 13.045        | 10.076        | <b>8.743</b>  | 1.006        | 22.172        | <b>48.064</b> | 187.383        | 17.185            |  |
| Unstructured $\rho = 0.2$                                  | 13.636        | 10.374        | 9.044         | 0.946        | 22.022        | 49.660        | 188.583        | 17.614            |  |
| Unstructured $\rho = 0.3$                                  | 13.174        | <b>9.905</b>  | 9.106         | 0.933        | 21.853        | 54.262        | 191.440        | 18.205            |  |
| Unstructured $\rho = 0.4$                                  | <b>12.951</b> | 10.837        | 8.758         | 0.874        | <b>21.769</b> | 51.052        | 189.925        | 17.707            |  |
| Unstructured $\rho = 0.5$                                  | 13.887        | 10.856        | 8.859         | <b>0.798</b> | 22.416        | 50.924        | 192.805        | 17.957            |  |
| Unstructured $\rho = 0.6$                                  | 13.572        | 11.265        | 8.937         | 1.092        | 22.836        | 51.588        | 193.798        | 18.215            |  |
| Unstructured $\rho = 0.7$                                  | 13.677        | 10.464        | 9.877         | 1.170        | 22.623        | 57.639        | 194.791        | 19.242            |  |
| Unstructured $\rho = 0.8$                                  | 14.668        | 10.758        | 12.219        | 1.133        | 23.531        | 61.064        | 189.744        | 20.562            |  |
| Unstructured $\rho = 0.9$                                  | 15.590        | 10.300        | 12.350        | 1.127        | 22.830        | 63.394        | <b>186.573</b> | 20.932            |  |
| CurricularFace [25] - $pAUC * 10^3$ (FMR = $10^{-3}$ ) [4] |               |               |               |              |               |               |                |                   |  |
| Methods                                                    | Adience       | AgeDB-30      | CFP-FP        | LFW          | CALFW         | CPLFW         | XQLFW          | $\overline{pAUC}$ |  |
| Unstructured $\rho = 0.1$                                  | 11.564        | 10.730        | 9.258         | 1.006        | 21.376        | <b>42.766</b> | 168.681        | 16.116            |  |
| Unstructured $\rho = 0.2$                                  | 12.336        | <b>10.176</b> | <b>8.556</b>  | 1.001        | 21.218        | 43.182        | 169.495        | 16.078            |  |
| Unstructured $\rho = 0.3$                                  | 11.935        | 10.887        | 9.140         | 0.987        | <b>20.985</b> | 44.248        | 171.296        | 16.364            |  |
| Unstructured $\rho = 0.4$                                  | 11.659        | 11.070        | 8.867         | 0.929        | 21.081        | 43.385        | 170.833        | 16.165            |  |
| Unstructured $\rho = 0.5$                                  | 12.453        | 10.971        | 9.344         | <b>0.818</b> | 21.500        | 44.401        | 172.527        | 16.581            |  |
| Unstructured $\rho = 0.6$                                  | 12.117        | 11.424        | 9.312         | 1.092        | 21.901        | 44.949        | 172.224        | 16.799            |  |
| Unstructured $\rho = 0.7$                                  | 12.250        | 11.015        | 9.771         | 1.170        | 21.788        | 48.376        | 172.332        | 17.395            |  |
| Unstructured $\rho = 0.8$                                  | 12.980        | 11.548        | 12.407        | 1.133        | 22.365        | 47.928        | 169.064        | 18.060            |  |
| Unstructured $\rho = 0.9$                                  | 13.900        | 10.890        | 13.347        | 1.127        | 21.893        | 47.166        | <b>165.039</b> | 18.054            |  |
| ElasticFace [7] - $pAUC * 10^3$ (FMR = $10^{-3}$ ) [4]     |               |               |               |              |               |               |                |                   |  |
| Methods                                                    | Adience       | AgeDB-30      | CFP-FP        | LFW          | CALFW         | CPLFW         | XQLFW          | $\overline{pAUC}$ |  |
| Unstructured $\rho = 0.1$                                  | <b>14.466</b> | <b>9.271</b>  | 8.451         | 0.887        | 21.282        | <b>44.853</b> | 176.500        | 16.535            |  |
| Unstructured $\rho = 0.2$                                  | 15.203        | 9.298         | <b>7.565</b>  | 0.827        | 21.222        | 45.541        | 177.543        | 16.609            |  |
| Unstructured $\rho = 0.3$                                  | 14.698        | 9.927         | 7.782         | 0.814        | <b>20.682</b> | 46.239        | 179.343        | 16.690            |  |
| Unstructured $\rho = 0.4$                                  | 14.509        | 10.038        | 7.969         | 0.755        | 20.973        | 45.307        | 178.396        | 16.592            |  |
| Unstructured $\rho = 0.5$                                  | 15.394        | 10.054        | 8.633         | <b>0.679</b> | 21.245        | 46.766        | 180.910        | 17.129            |  |
| Unstructured $\rho = 0.6$                                  | 14.837        | 10.378        | 8.448         | 0.974        | 21.735        | 47.489        | 180.965        | 17.310            |  |
| Unstructured $\rho = 0.7$                                  | 15.012        | 9.671         | 8.915         | 1.053        | 21.732        | 50.233        | 182.343        | 17.769            |  |
| Unstructured $\rho = 0.8$                                  | 16.532        | 9.672         | 10.682        | 1.017        | 22.475        | 53.326        | 177.513        | 18.951            |  |
| Unstructured $\rho = 0.9$                                  | 17.572        | 9.808         | 11.265        | 1.043        | 22.113        | 54.480        | <b>173.979</b> | 19.380            |  |
| MagFace [35] - $pAUC * 10^3$ (FMR = $10^{-3}$ ) [4]        |               |               |               |              |               |               |                |                   |  |
| Methods                                                    | Adience       | AgeDB-30      | CFP-FP        | LFW          | CALFW         | CPLFW         | XQLFW          | $\overline{pAUC}$ |  |
| Unstructured $\rho = 0.1$                                  | <b>13.332</b> | <b>10.689</b> | 10.886        | 1.032        | 21.774        | <b>52.677</b> | <b>196.726</b> | 18.399            |  |
| Unstructured $\rho = 0.2$                                  | 14.026        | 10.845        | <b>10.483</b> | 0.954        | 21.749        | 54.247        | 199.101        | 18.717            |  |
| Unstructured $\rho = 0.3$                                  | 13.640        | 10.886        | 10.822        | 0.977        | <b>21.512</b> | 61.676        | 202.518        | 19.919            |  |
| Unstructured $\rho = 0.4$                                  | 13.384        | 11.082        | 10.506        | 0.958        | 21.532        | 56.992        | 199.355        | 19.076            |  |
| Unstructured $\rho = 0.5$                                  | 14.278        | 11.076        | 10.957        | <b>0.823</b> | 21.962        | 55.992        | 202.837        | 19.181            |  |
| Unstructured $\rho = 0.6$                                  | 13.875        | 11.975        | 10.926        | 1.118        | 22.564        | 57.054        | 204.008        | 19.585            |  |
| Unstructured $\rho = 0.7$                                  | 14.082        | 11.216        | 11.737        | 1.239        | 22.528        | 77.373        | 205.857        | 23.029            |  |
| Unstructured $\rho = 0.8$                                  | 15.140        | 11.339        | 15.235        | 1.250        | 23.172        | 86.173        | 200.850        | 25.385            |  |
| Unstructured $\rho = 0.9$                                  | 15.902        | 11.143        | 16.631        | 1.298        | 22.454        | 92.730        | 197.217        | 26.693            |  |

## References

- 591  
592  
593  
594  
595  
596  
597  
598  
599  
600  
601  
602  
603  
604  
605  
606  
607  
608  
609  
610  
611  
612  
613  
614  
615  
616  
617  
618  
619  
620  
621  
622  
623  
624  
625  
626  
627  
628  
629  
630  
631  
632  
633  
634  
635  
636  
637  
638  
639  
640  
641  
642  
643  
644  
645  
646
- [1] Fernando Alonso-Fernandez, Kevin Hernandez-Diaz, Jose Maria Buades Rubio, Prayag Tiwari, and Josef Bigun. Deep network pruning: A comparative study on cnns in face recognition. *Pattern Recognition Letters*, 189:221–228, 2025. 2
- [2] Andrea Atzori, Fadi Boutros, and Naser Damer. Vit-fiq: Assessing face image quality using vision transformers. In *2025 IEEE/CVF International Conference on Computer Vision Workshops (ICCVW)*, 2025. 1, 2, 5, 6, 8
- [3] Žiga Babnik, Peter Peer, and Vitomir Struc. Faceqan: Face image quality assessment through adversarial noise exploration. In *2022 26th International Conference on Pattern Recognition (ICPR)*, pages 748–754, 2022. 1, 2, 6
- [4] Žiga Babnik, Peter Peer, and Vitomir Štruc. Diffiqa: Face image quality assessment using denoising diffusion probabilistic models. In *2023 IEEE International Joint Conference on Biometrics (IJCB)*, pages 1–10, 2023. 1, 2, 5, 8
- [5] Žiga Babnik, Peter Peer, and Vitomir Štruc. eDiffiQA: Towards Efficient Face Image Quality Assessment based on Denoising Diffusion Probabilistic Models. *IEEE Transactions on Biometrics, Behavior, and Identity Science (TBIOM)*, 2024. 2, 4, 5, 6, 8
- [6] Žiga Babnik, Deepak Kumar Jain, Peter Peer, and Vitomir Štruc. FROQ: Observing Face Recognition Models for Efficient Quality Assessment. 2025. 1, 2, 5, 6, 8
- [7] Fadi Boutros, Naser Damer, Florian Kirchbuchner, and Arjan Kuijper. Elasticface: Elastic margin loss for deep face recognition. In *IEEE/CVF Conference on Computer Vision and Pattern Recognition Workshops, CVPR Workshops 2022, New Orleans, LA, USA, June 19-20, 2022*, pages 1577–1586. IEEE, 2022. 5, 8, 1, 4, 6
- [8] Fadi Boutros, Meiling Fang, Marcel Klemt, Biying Fu, and Naser Damer. CR-FIQA: face image quality assessment by learning sample relative classifiability. In *IEEE/CVF Conference on Computer Vision and Pattern Recognition, CVPR 2023, Vancouver, BC, Canada, June 17-24, 2023*, pages 5836–5845. IEEE, 2023. 1, 2, 4, 5, 6, 8
- [9] Jiansheng Chen, Yu Deng, Gaocheng Bai, and Guangda Su. Face image quality assessment based on learning to rank. *IEEE Signal Process. Lett.*, 22(1):90–94, 2015. 1, 2, 5, 8
- [10] Wei-Ting Chen, Gurunandan Krishnan, Qiang Gao, Sy-Yen Kuo, Sizhuo Ma, and Jian Wang. Dsl-fiq: Assessing facial image quality via dual-set degradation learning and landmark-guided transformer. In *2024 IEEE/CVF Conference on Computer Vision and Pattern Recognition (CVPR)*, pages 2931–2941, 2024. 2
- [11] Jiankang Deng, Jia Guo, Niannan Xue, and Stefanos Zafeiriou. Arcface: Additive angular margin loss for deep face recognition. In *IEEE Conference on Computer Vision and Pattern Recognition, CVPR 2019, Long Beach, CA, USA, June 16-20, 2019*, pages 4690–4699. Computer Vision Foundation / IEEE, 2019. 1, 3, 5, 8, 4, 6
- [12] Eran Eidinger, Roeen Enbar, and Tal Hassner. Age and gender estimation of unfiltered faces. *IEEE Trans. Inf. Forensics Secur.*, 9(12):2170–2179, 2014. 5
- [13] Gongfan Fang, Xinyin Ma, Mingli Song, Michael Bi Mi, and Xinchao Wang. Depgraph: Towards any structural pruning. *2023 IEEE/CVF Conference on Computer Vision and Pattern Recognition (CVPR)*, pages 16091–16101, 2023. 5
- [14] Jonathan Frankle, Gintare Karolina Dziugaite, Daniel M. Roy, and Michael Carbin. Pruning neural networks at initialization: Why are we missing the mark? In *9th International Conference on Learning Representations, ICLR 2021, Virtual Event, Austria, May 3-7, 2021*. OpenReview.net, 2021. 3
- [15] Biying Fu, Cong Chen, Olaf Henniger, and Naser Damer. A deep insight into measuring face image utility with general and face-specific image quality metrics. In *IEEE/CVF Winter Conference on Applications of Computer Vision, WACV 2022, Waikoloa, HI, USA, January 3-8, 2022*, pages 1121–1130. IEEE, 2022. 1
- [16] P. Grother and E. Tabassi. Performance of biometric quality measures. *IEEE Trans. on Pattern Analysis and Machine Intelligence*, 29(4):531–543, 2007. 5
- [17] P. Grother, M. Ngan A. Hom, and K. Hanaoka. Ongoing face recognition vendor test (frvt) part 5: Face image quality assessment (4th draft). In *National Institute of Standards and Technology*. Tech. Rep., Sep. 2021. 5
- [18] Yandong Guo, Lei Zhang, Yuxiao Hu, Xiaodong He, and Jianfeng Gao. Ms-celeb-1m: A dataset and benchmark for large-scale face recognition. In *Computer Vision - ECCV 2016 - 14th European Conference, Amsterdam, The Netherlands, October 11-14, 2016, Proceedings, Part III*, pages 87–102. Springer, 2016. 5
- [19] Kaiming He, Xiangyu Zhang, Shaoqing Ren, and Jian Sun. Deep residual learning for image recognition. In *2016 IEEE Conference on Computer Vision and Pattern Recognition, CVPR 2016, Las Vegas, NV, USA, June 27-30, 2016*, pages 770–778. IEEE Computer Society, 2016. 5
- [20] Javier Hernandez-Ortega, Javier Galbally, Julian Fierrez, Rudolf Haraksim, and Laurent Beslay. Faceqnet: Quality assessment for face recognition based on deep learning. In *2019 International Conference on Biometrics, ICB 2019, Crete, Greece, June 4-7, 2019*, pages 1–8. IEEE, 2019. 5, 8
- [21] Javier Hernandez-Ortega, Javier Galbally, Julian Fierrez, and Laurent Beslay. Biometric quality: Review and application to face recognition with faceqnet. *CoRR*, abs/2006.03298, 2020. 1, 2, 5, 8
- [22] Torsten Hoeffler, Dan Alistarh, Tal Ben-Nun, Nikoli Dryden, and Alexandra Peste. Sparsity in deep learning: pruning and growth for efficient inference and training in neural networks. *J. Mach. Learn. Res.*, 22(1), 2021. 2
- [23] Sara Hooker, Aaron C. Courville, Gregory Clark, Yann Dauphin, and Andrea Frome. What do compressed deep neural networks forget. *arXiv: Learning*, 2019. 2, 3
- [24] Gary B. Huang, Manu Ramesh, Tamara Berg, and Erik Learned-Miller. Labeled faces in the wild: A database for studying face recognition in unconstrained environments. Technical Report 07-49, University of Massachusetts, Amherst, 2007. 5
- [25] Yuge Huang, Yuhan Wang, Ying Tai, Xiaoming Liu, Pengcheng Shen, Shaoxin Li, Jilin Li, and Feiyue Huang. 647  
648  
649  
650  
651  
652  
653  
654  
655  
656  
657  
658  
659  
660  
661  
662  
663  
664  
665  
666  
667  
668  
669  
670  
671  
672  
673  
674  
675  
676  
677  
678  
679  
680  
681  
682  
683  
684  
685  
686  
687  
688  
689  
690  
691  
692  
693  
694  
695  
696  
697  
698  
699  
700  
701  
702  
703

- 704 Curricularface: Adaptive curriculum learning loss for deep  
705 face recognition. In *2020 IEEE/CVF Conference on Com-*  
706 *puter Vision and Pattern Recognition, CVPR 2020, Seattle,*  
707 *WA, USA, June 13-19, 2020*, pages 5900–5909. Computer  
708 Vision Foundation / IEEE, 2020. 5, 8, 1, 4, 6
- [26] ISO/IEC JTC1 SC37 Biometrics. ISO/IEC TR 29794-5:2010  
709 Information technology - Biometric sample quality - Part 5:  
710 Face image data. International Organization for Standardiza-  
711 tion, 2010. 1
- [27] ISO/IEC JTC1 SC37 Biometrics. ISO/IEC 19795-1:2021 In-  
712 formation technology — Biometric performance testing and  
713 reporting — Part 1: Principles and framework. International  
714 Organization for Standardization, 2021. 5
- [28] Zhiyu Jiang, Zhe Liu, Chen Sun, Yantao Shen, Xiaohua  
715 Xue, Hongyuan Zha, and Zhiwu Huang. Self-damaging con-  
716 trastive learning. In *International Conference on Machine*  
717 *Learning (ICML)*, 2021. 3
- [29] Minchul Kim, Anil K. Jain, and Xiaoming Liu. Adaface:  
721 Quality adaptive margin for face recognition. In *CVPR*,  
722 pages 18729–18738. IEEE, 2022. 1
- [30] Martin Knoche, Stefan Hörmann, and Gerhard Rigoll.  
723 Cross-quality LFW: A database for analyzing cross- resolu-  
724 tion image face recognition in unconstrained environments.  
725 In *16th IEEE International Conference on Automatic Face*  
726 *and Gesture Recognition, FG 2021, Jodhpur, India, Decem-*  
727 *ber 15-18, 2021*, pages 1–5. IEEE, 2021. 5
- [31] Jan Niklas Kolf, Naser Damer, and Fadi Boutros. Grafiqs:  
730 Face image quality assessment using gradient magnitudes.  
731 In *2024 IEEE/CVF Conference on Computer Vision and Pat-*  
732 *tern Recognition Workshops (CVPRW)*, pages 1490–1499,  
733 2024. 1, 2, 4, 5, 6, 8
- [32] Tailin Liang, John Glossner, Lei Wang, Shaobo Shi, and Xi-  
734 aotong Zhang. Pruning and quantization for deep neural  
735 network acceleration: A survey. *Neurocomputing*, 461:370–  
736 403, 2021. 2
- [33] Weiyang Liu, Yandong Wen, Zhiding Yu, Ming Li, Bhiksha  
737 Raj, and Le Song. SphereFace: Deep hypersphere embed-  
738 ding for face recognition. In *Proc. of the IEEE Conf. on*  
739 *Computer Vision and Pattern Recognition*, pages 212–220,  
740 2017. 3
- [34] Brianna Maze, Jocelyn C. Adams, James A. Duncan,  
741 Nathan D. Kalka, Tim Miller, Charles Otto, Anil K. Jain,  
742 W. Tyler Niggel, Janet Anderson, Jordan Cheney, and Patrick  
743 Grother. IARPA janus benchmark - C: face dataset and pro-  
744 tocol. In *2018 International Conference on Biometrics, ICB*  
745 *2018, Gold Coast, Australia, February 20-23, 2018*, pages  
746 158–165. IEEE, 2018. 5
- [35] Qiang Meng, Shichao Zhao, Zhida Huang, and Feng Zhou.  
747 Magface: A universal representation for face recognition and  
748 quality assessment. In *IEEE Conference on Computer Vision*  
749 *and Pattern Recognition, CVPR 2021, virtual, June 19-25,*  
750 *2021*, pages 14225–14234. Computer Vision Foundation /  
751 IEEE, 2021. 1, 2, 5, 6, 8, 4
- [36] Stylianos Moschoglou, Athanasios Papaioannou, Chris-  
752 tos Sagonas, Jiankang Deng, Irene Kotsia, and Stefanos  
753 Zafeiriou. Agedb: The first manually collected, in-the-wild  
754 age database. In *2017 IEEE CVPRW, CVPR Workshops*  
755 *2017, Honolulu, HI, USA, July 21-26, 2017*, pages 1997–  
756 2005. IEEE Computer Society, 2017. 5
- [37] Fu-Zhao Ou, Xingyu Chen, Ruixin Zhang, Yuge Huang,  
757 Shaoxin Li, Jilin Li, Yong Li, Liujuan Cao, and Yuan-Gen  
758 Wang. SDD-FIQA: unsupervised face image quality assess-  
759 ment with similarity distribution distance. In *IEEE Confer-*  
760 *ence on Computer Vision and Pattern Recognition, CVPR*  
761 *2021, virtual, June 19-25, 2021*, pages 7670–7679. Com-  
762 puter Vision Foundation / IEEE, 2021. 1, 2, 5, 6, 8
- [38] Fu-Zhao Ou, Chongyi Li, Shiqi Wang, and Sam Kwong.  
763 MR-FIQA: face image quality assessment with multi-  
764 reference representations from synthetic data generation. In  
765 *IEEE/CVF International Conference on Computer Vision,*  
766 *ICCV 2025, Honolulu, Hawaii, USA, October 19-23, 2025*,  
767 pages 12915–12925. Computer Vision Foundation / IEEE,  
768 2025. 2, 4
- [39] Fu-Zhao Ou, Chongyi Li, Shiqi Wang, and Sam Kwong.  
769 Clib-fiqqa: Face image quality assessment with confidence  
770 calibration. In *2024 IEEE/CVF Conference on Computer*  
771 *Vision and Pattern Recognition (CVPR)*, pages 1694–1704,  
772 2024. 2
- [40] Fu-Zhao Ou, Chongyi Li, Shiqi Wang, and Sam Kwong.  
773 Clib-fiqqa: Face image quality assessment with confidence  
774 calibration. In *Proceedings of the IEEE/CVF Conference*  
775 *on Computer Vision and Pattern Recognition (CVPR)*, pages  
776 1694–1704, 2024. 1, 5, 6, 8
- [41] Guray Ozgur, Eduarda Caldeira, Tahar Chettaoui, Jan Niklas  
777 Kolf, Marco Huber, Naser Damer, and Fadi Boutros. Vitnt-  
778 fiqa: Training-free face image quality assessment with vision  
779 transformers, 2026. 2
- [42] Guray Ozgur, Eduarda Caldeira, Tahar Chettaoui, Jan Niklas  
780 Kolf, Marco Huber, Naser Damer, and Fadi Boutros. Vitnt-  
781 fiqa: Training-free face image quality assessment with vision  
782 transformers. *CoRR*, abs/2601.05741, 2026. 1, 5, 6, 8
- [43] Adam Paszke, Sam Gross, Francisco Massa, Adam Lerer,  
783 James Bradbury, Gregory Chanan, Trevor Killeen, Zeming  
784 Lin, Natalia Gimelshein, Luca Antiga, Alban Desmai-  
785 son, Andreas Kopf, Edward Yang, Zachary DeVito, Mar-  
786 tin Raison, Alykhan Tejani, Sasank Chilamkurthy, Benoit  
787 Steiner, Lu Fang, Junjie Bai, and Soumith Chintala. Pytorch:  
788 An imperative style, high-performance deep learning library.  
789 In *Advances in Neural Information Processing Systems 32*,  
790 pages 8024–8035. Curran Associates, Inc., 2019. 5
- [44] Torsten Schlett, Christian Rathgeb, Juan E. Tapia, and  
791 Christoph Busch. Considerations on the evaluation of bio-  
792 metric quality assessment algorithms. *IEEE Trans. Biom.*  
793 *Behav. Identity Sci.*, 6(1):54–67, 2024. 5
- [45] Soumyadip Sengupta, Jun-Cheng Chen, Carlos Domingo  
794 Castillo, Vishal M. Patel, Rama Chellappa, and David W. Ja-  
795 cobs. Frontal to profile face verification in the wild. In  
796 *2016 IEEE Winter Conference on Applications of Computer*  
797 *Vision, WACV 2016, Lake Placid, NY, USA, March 7-10, 2016*,  
798 pages 1–9. IEEE Computer Society, 2016. 5
- [46] Yichun Shi and Anil K. Jain. Probabilistic face embed-  
799 dings. In *2019 IEEE/CVF International Conference on Com-*  
800 *puter Vision, ICCV 2019, Seoul, Korea (South), October 27*  
801 *- November 2, 2019*, pages 6901–6910. IEEE, 2019. 1, 2, 5,  
802 8

- 819 [47] Hidenori Tanaka, Daniel Kunin, Daniel L. K. Yamins, and  
820 Surya Ganguli. Pruning neural networks without any data by  
821 iteratively conserving synaptic flow. In *Proceedings of the*  
822 *34th International Conference on Neural Information Pro-*  
823 *cessing Systems*, Red Hook, NY, USA, 2020. Curran Asso-  
824 ciates Inc. 3
- 825 [48] Philipp Terhörst, Jan Niklas Kolf, Naser Damer, Florian  
826 Kirchbuchner, and Arjan Kuijper. SER-FIQ: unsupervised  
827 estimation of face image quality based on stochastic embed-  
828 ding robustness. In *2020 IEEE/CVF Conference on Com-*  
829 *puter Vision and Pattern Recognition, CVPR 2020, Seattle,*  
830 *WA, USA, June 13-19, 2020*, pages 5650–5659. Computer  
831 Vision Foundation / IEEE, 2020. 1, 2, 5, 6, 8
- 832 [49] Hao Wang, Yitong Wang, Zheng Zhou, Xing Ji, Dihong  
833 Gong, Jingchao Zhou, Zhifeng Li, and Wei Liu. Cos-  
834 face: Large margin cosine loss for deep face recognition.  
835 In *CVPR*, pages 5265–5274. Computer Vision Foundation  
836 / IEEE Computer Society, 2018. 1, 3
- 837 [50] Weidi Xie, Jeffrey Byrne, and Andrew Zisserman. Inducing  
838 predictive uncertainty estimation for face verification. In *31st*  
839 *British Machine Vision Conference 2020, BMVC 2020, Vir-*  
840 *tual Event, UK, September 7-10, 2020*. BMVA Press, 2020.  
841 6
- 842 [51] Dong Yi, Zhen Lei, Shengcai Liao, and Stan Z. Li. Learn-  
843 ing face representation from scratch. *CoRR*, abs/1411.7923,  
844 2014. 5, 6
- 845 [52] Jie Zhao, Yuxiang Xiong, Jian Cheng, Jianshu Li, Yao Zhao,  
846 Jian Xing, Shuicheng Yan, and Jiashi Feng. Towards pose  
847 invariant face recognition in the wild. In *Proceedings of*  
848 *the IEEE/CVF Conference on Computer Vision and Pattern*  
849 *Recognition (CVPR)*, 2018. 1
- 850 [53] T. Zheng and W. Deng. Cross-pose lfw: A database for  
851 studying cross-pose face recognition in unconstrained en-  
852 vironments. Technical Report 18-01, Beijing University of  
853 Posts and Telecommunications, 2018. 5
- 854 [54] Tianyue Zheng, Weihong Deng, and Jiani Hu. Cross-age  
855 LFW: A database for studying cross-age face recognition in  
856 unconstrained environments. *CoRR*, abs/1708.08197, 2017.  
857 5
